# Supplementary material
Source: PubMed Central journal article supplement (PMC3104128)

**Supplementary Figure 1.** Phylogenetic trees for H6N6 swine influenza virus isolated from southern China: (A) PB2; (B) PB1; (C) PA; (D) NP; (E) MP; and (F) NS.

PB2

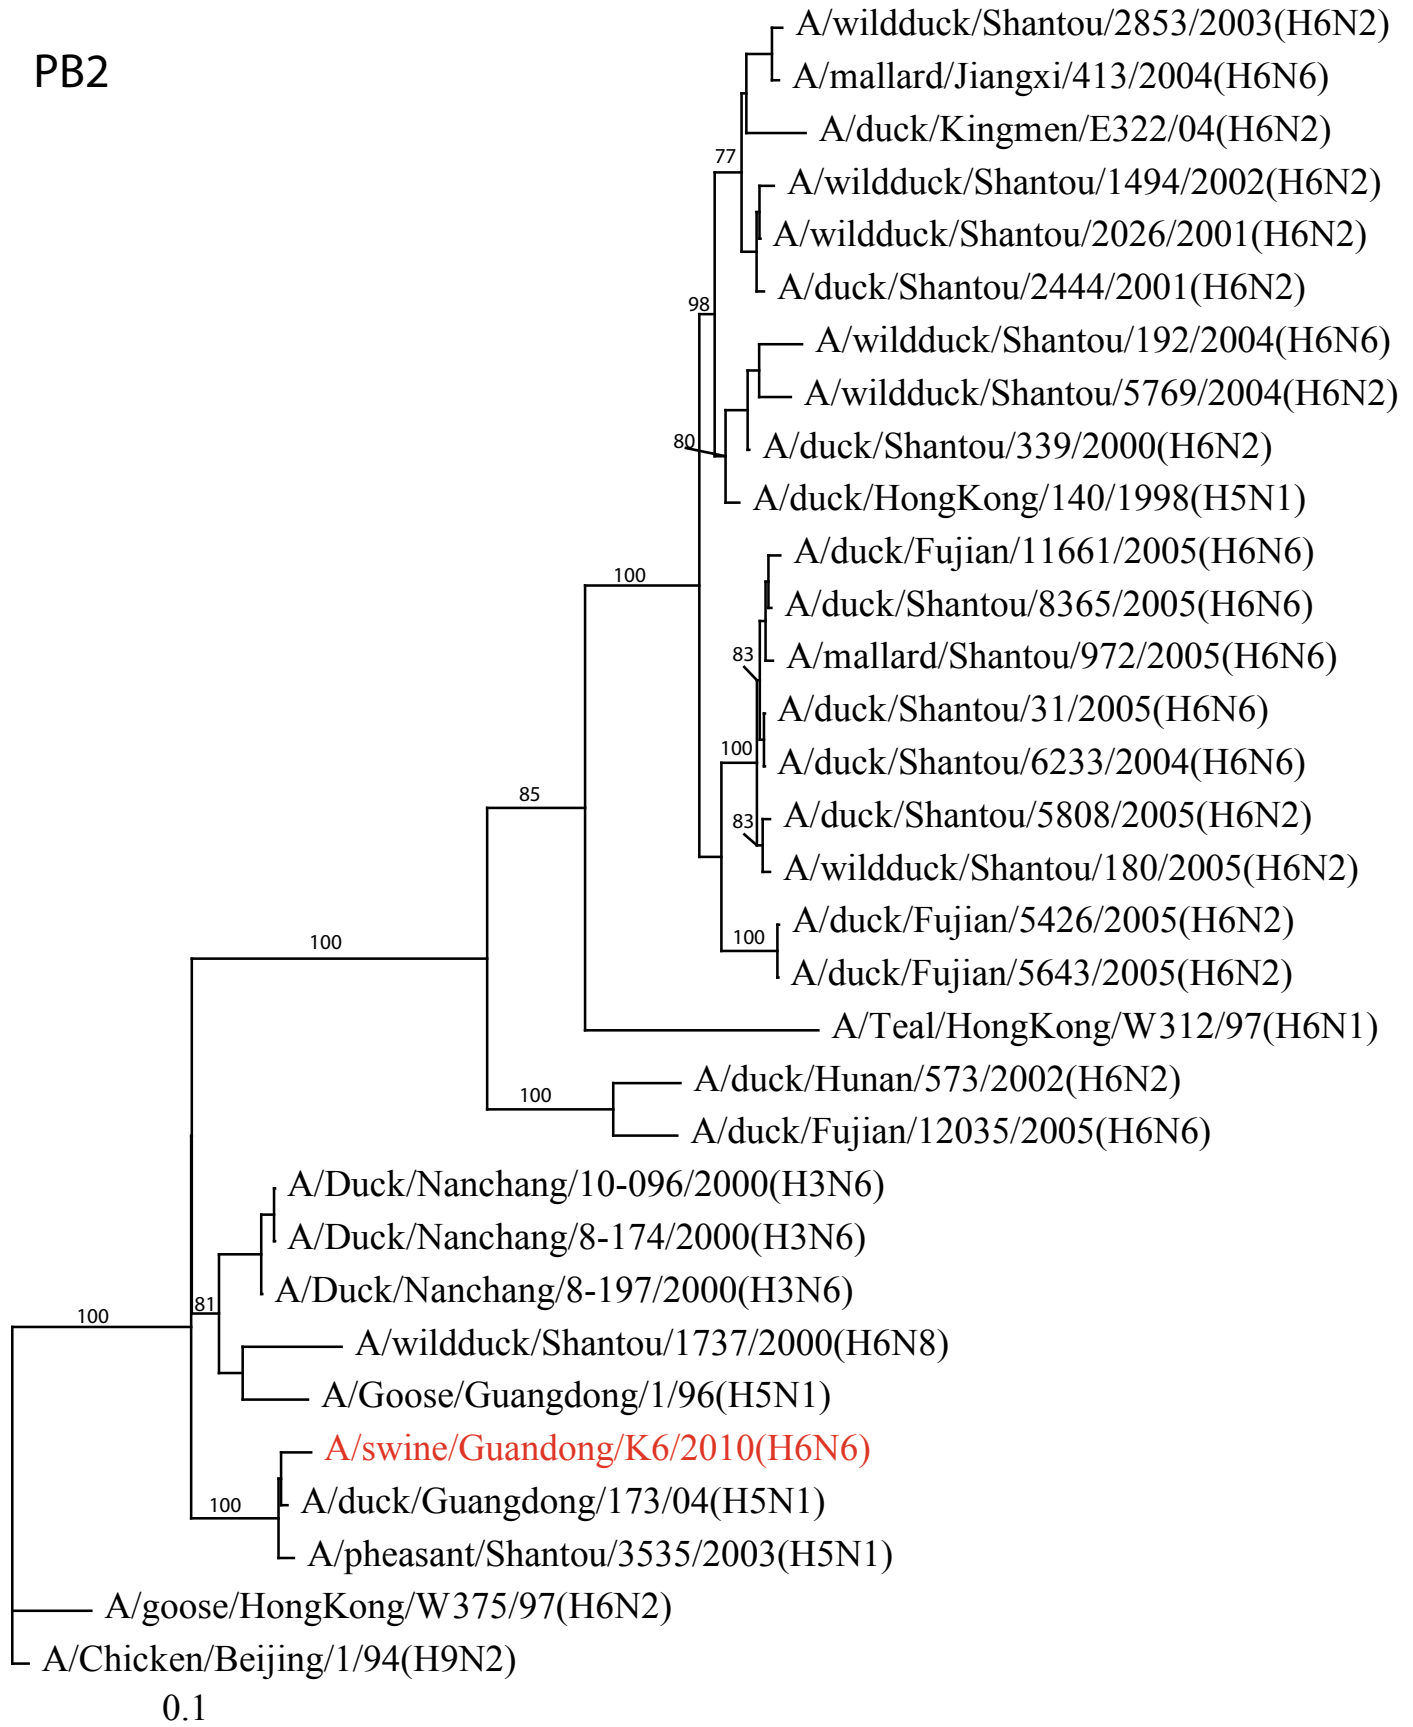

PB1

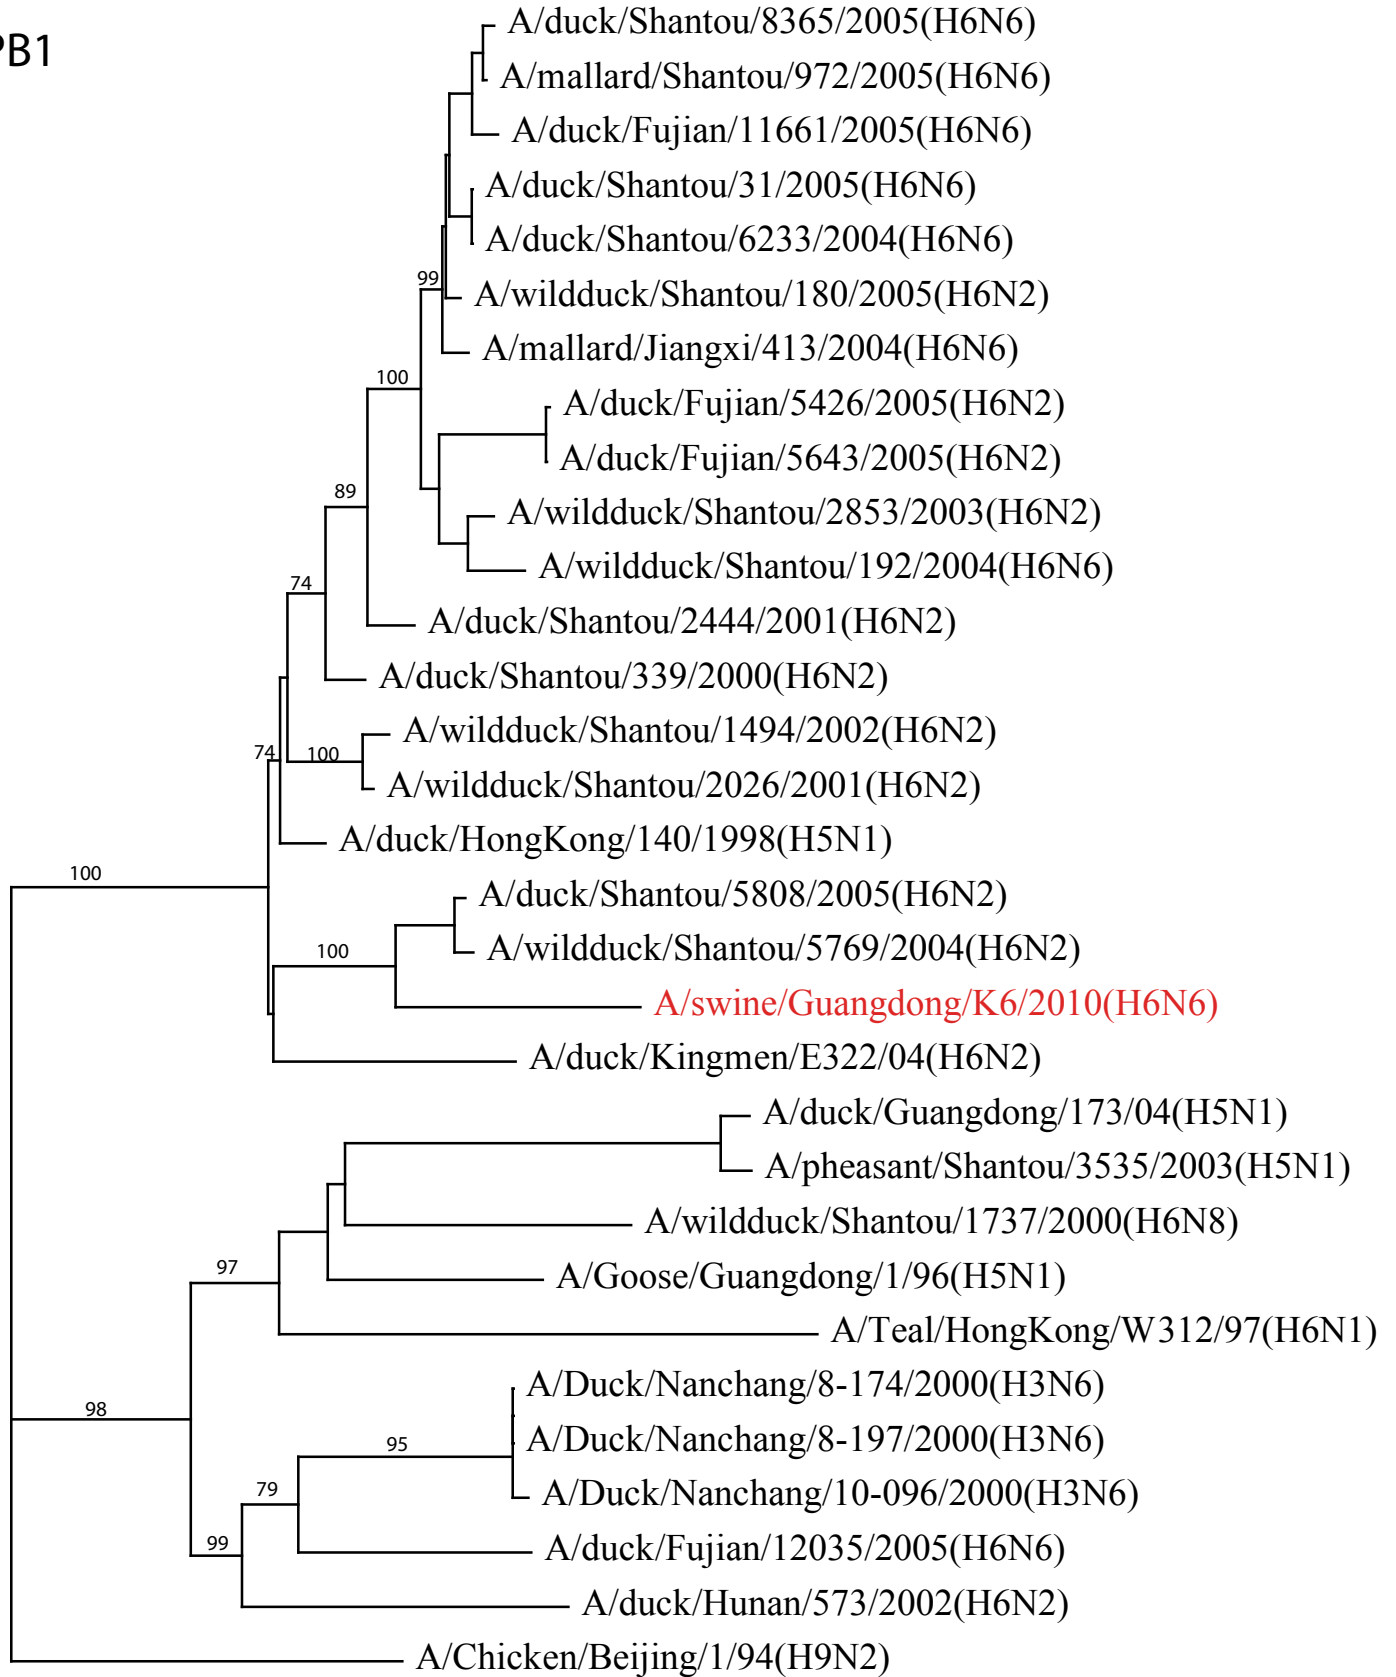

0.01

PA

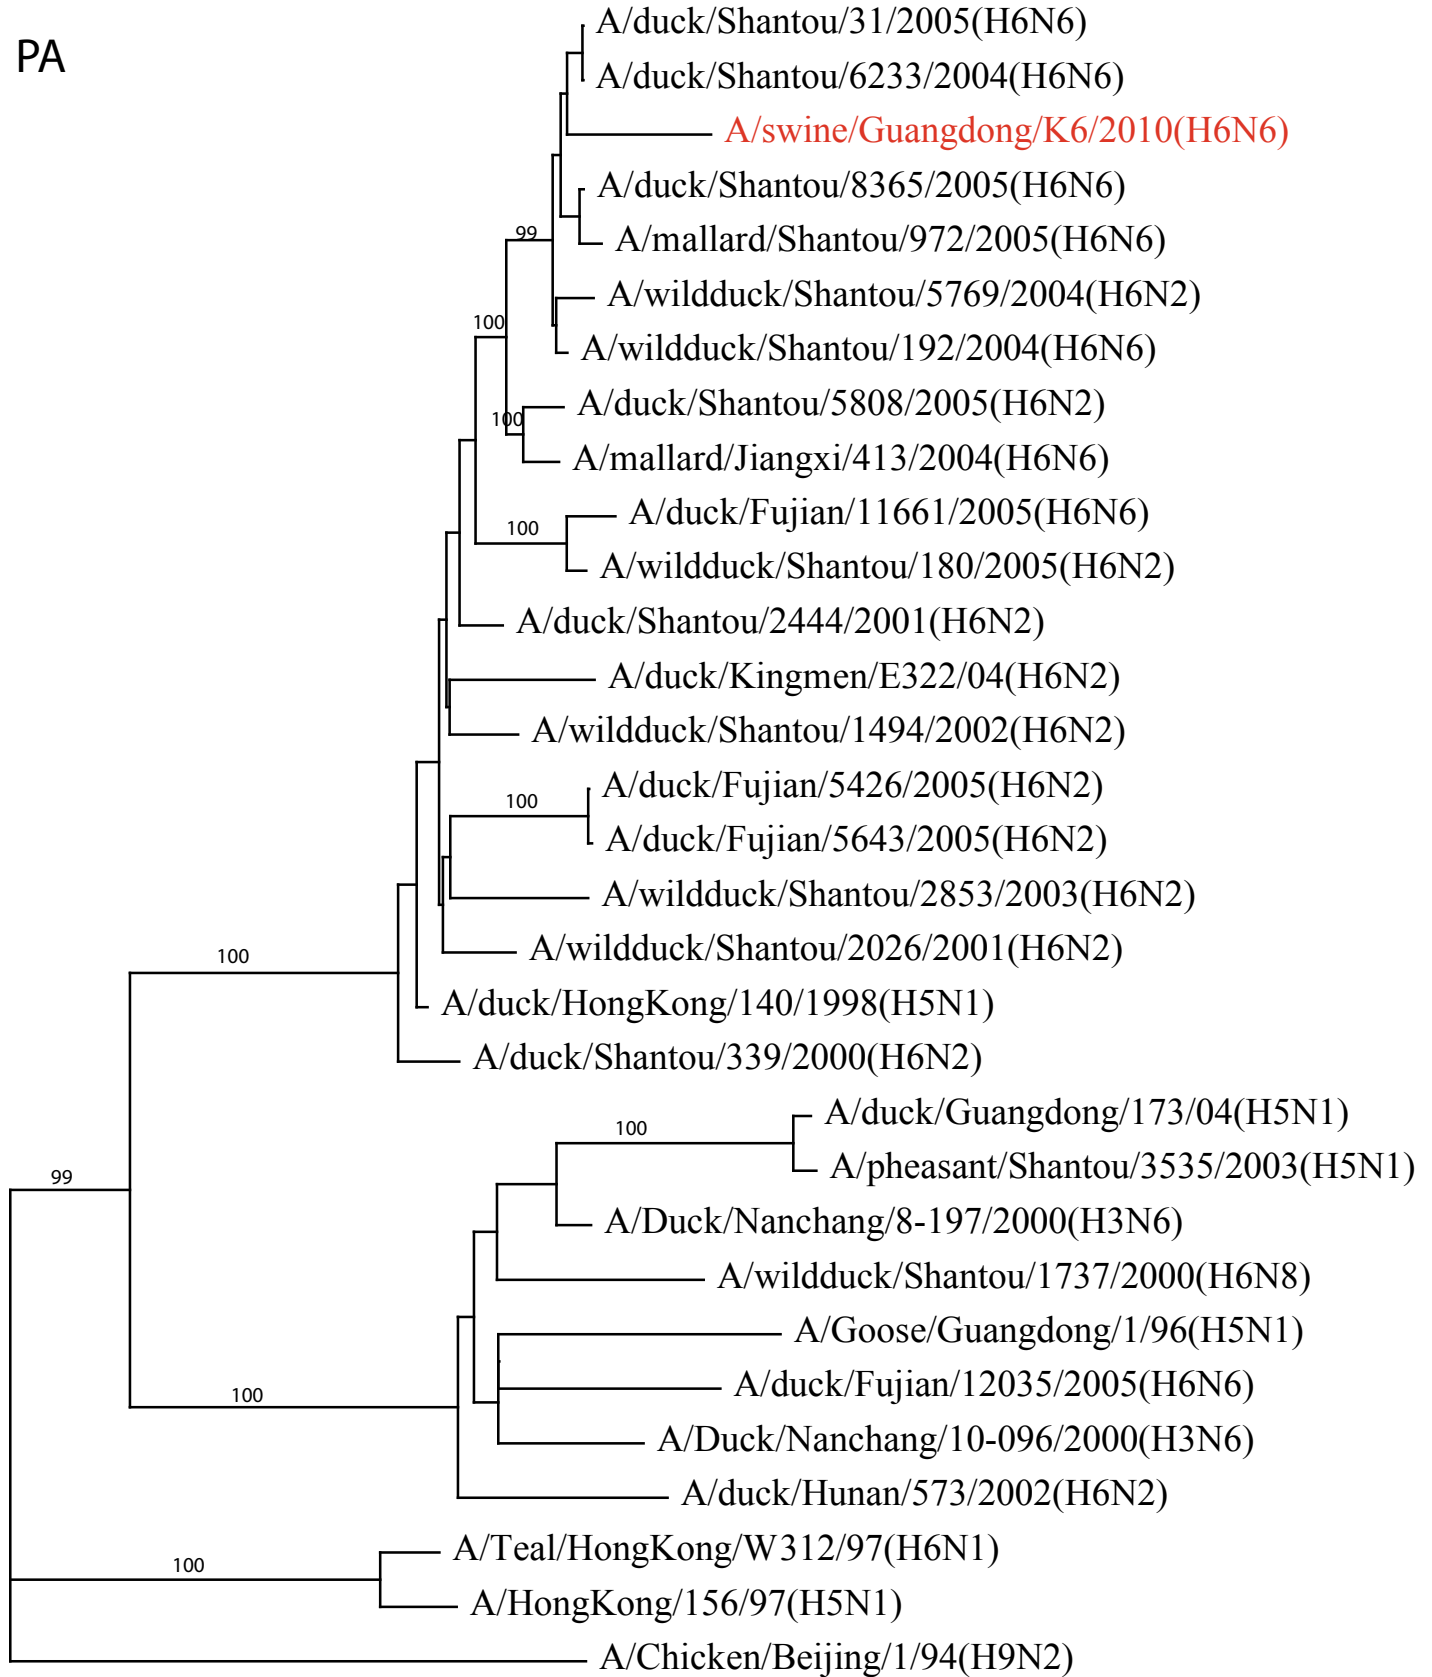

0.01

NP

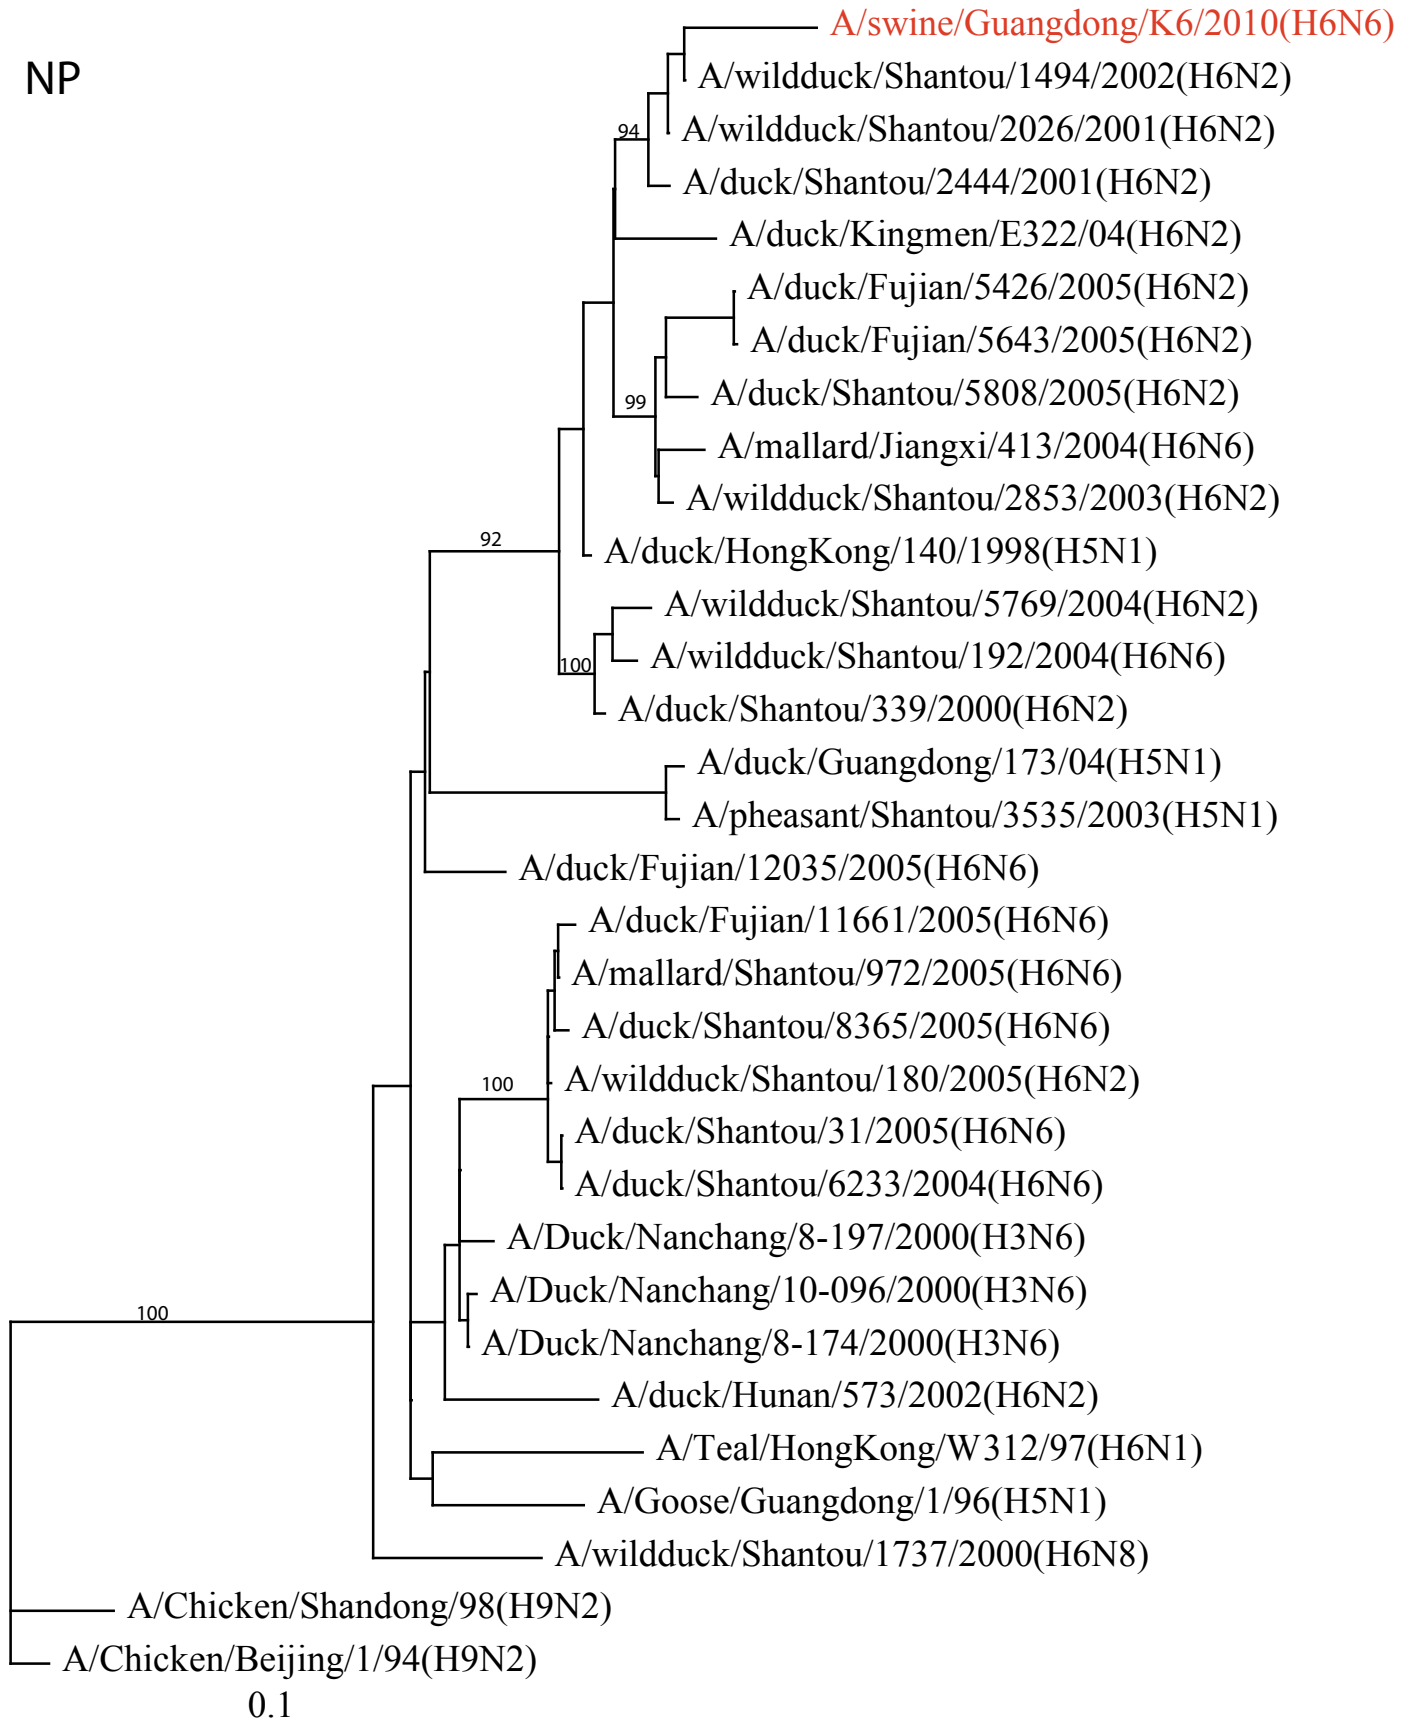

MP

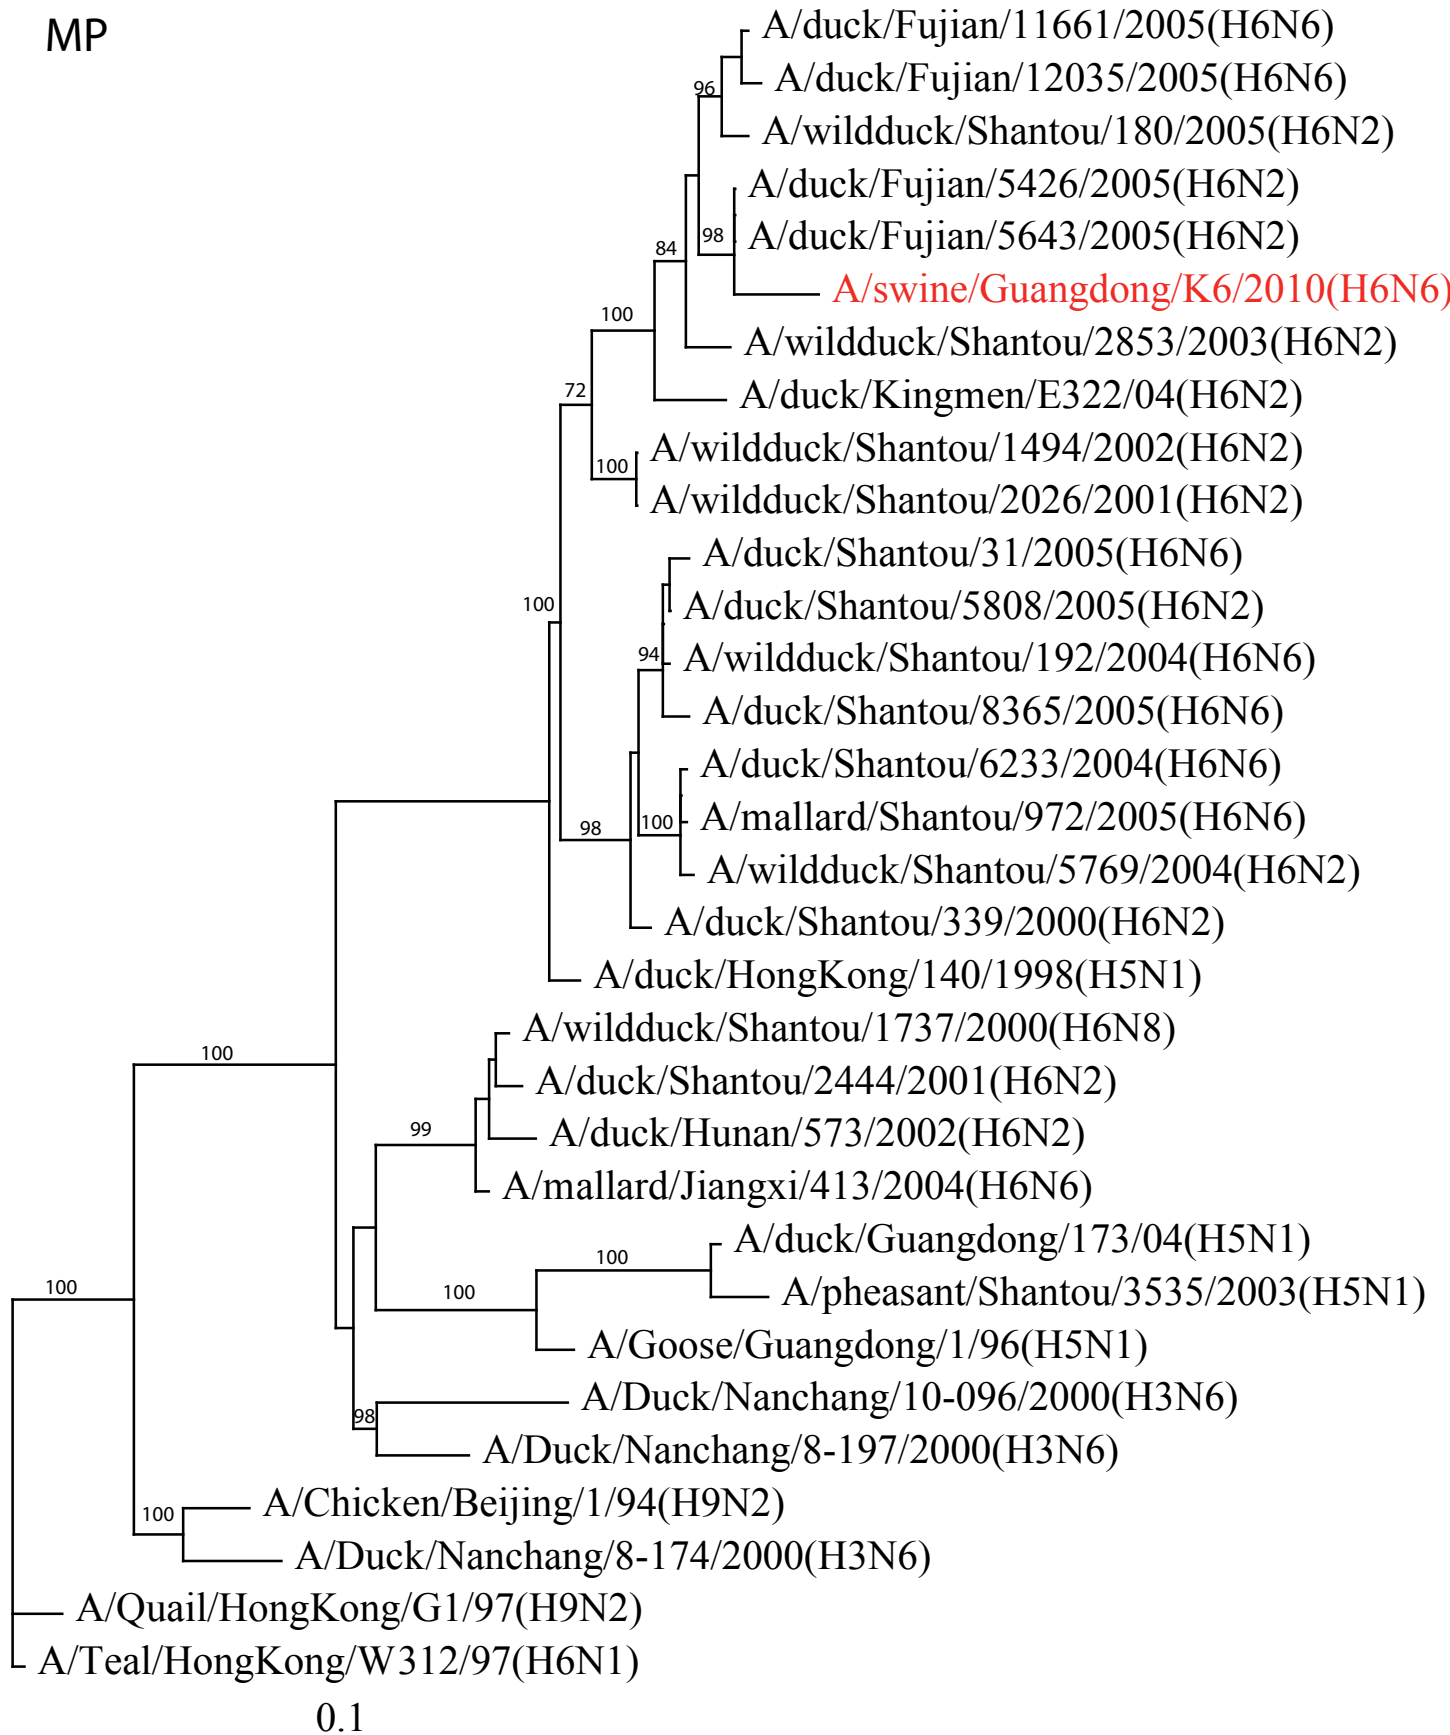

NS

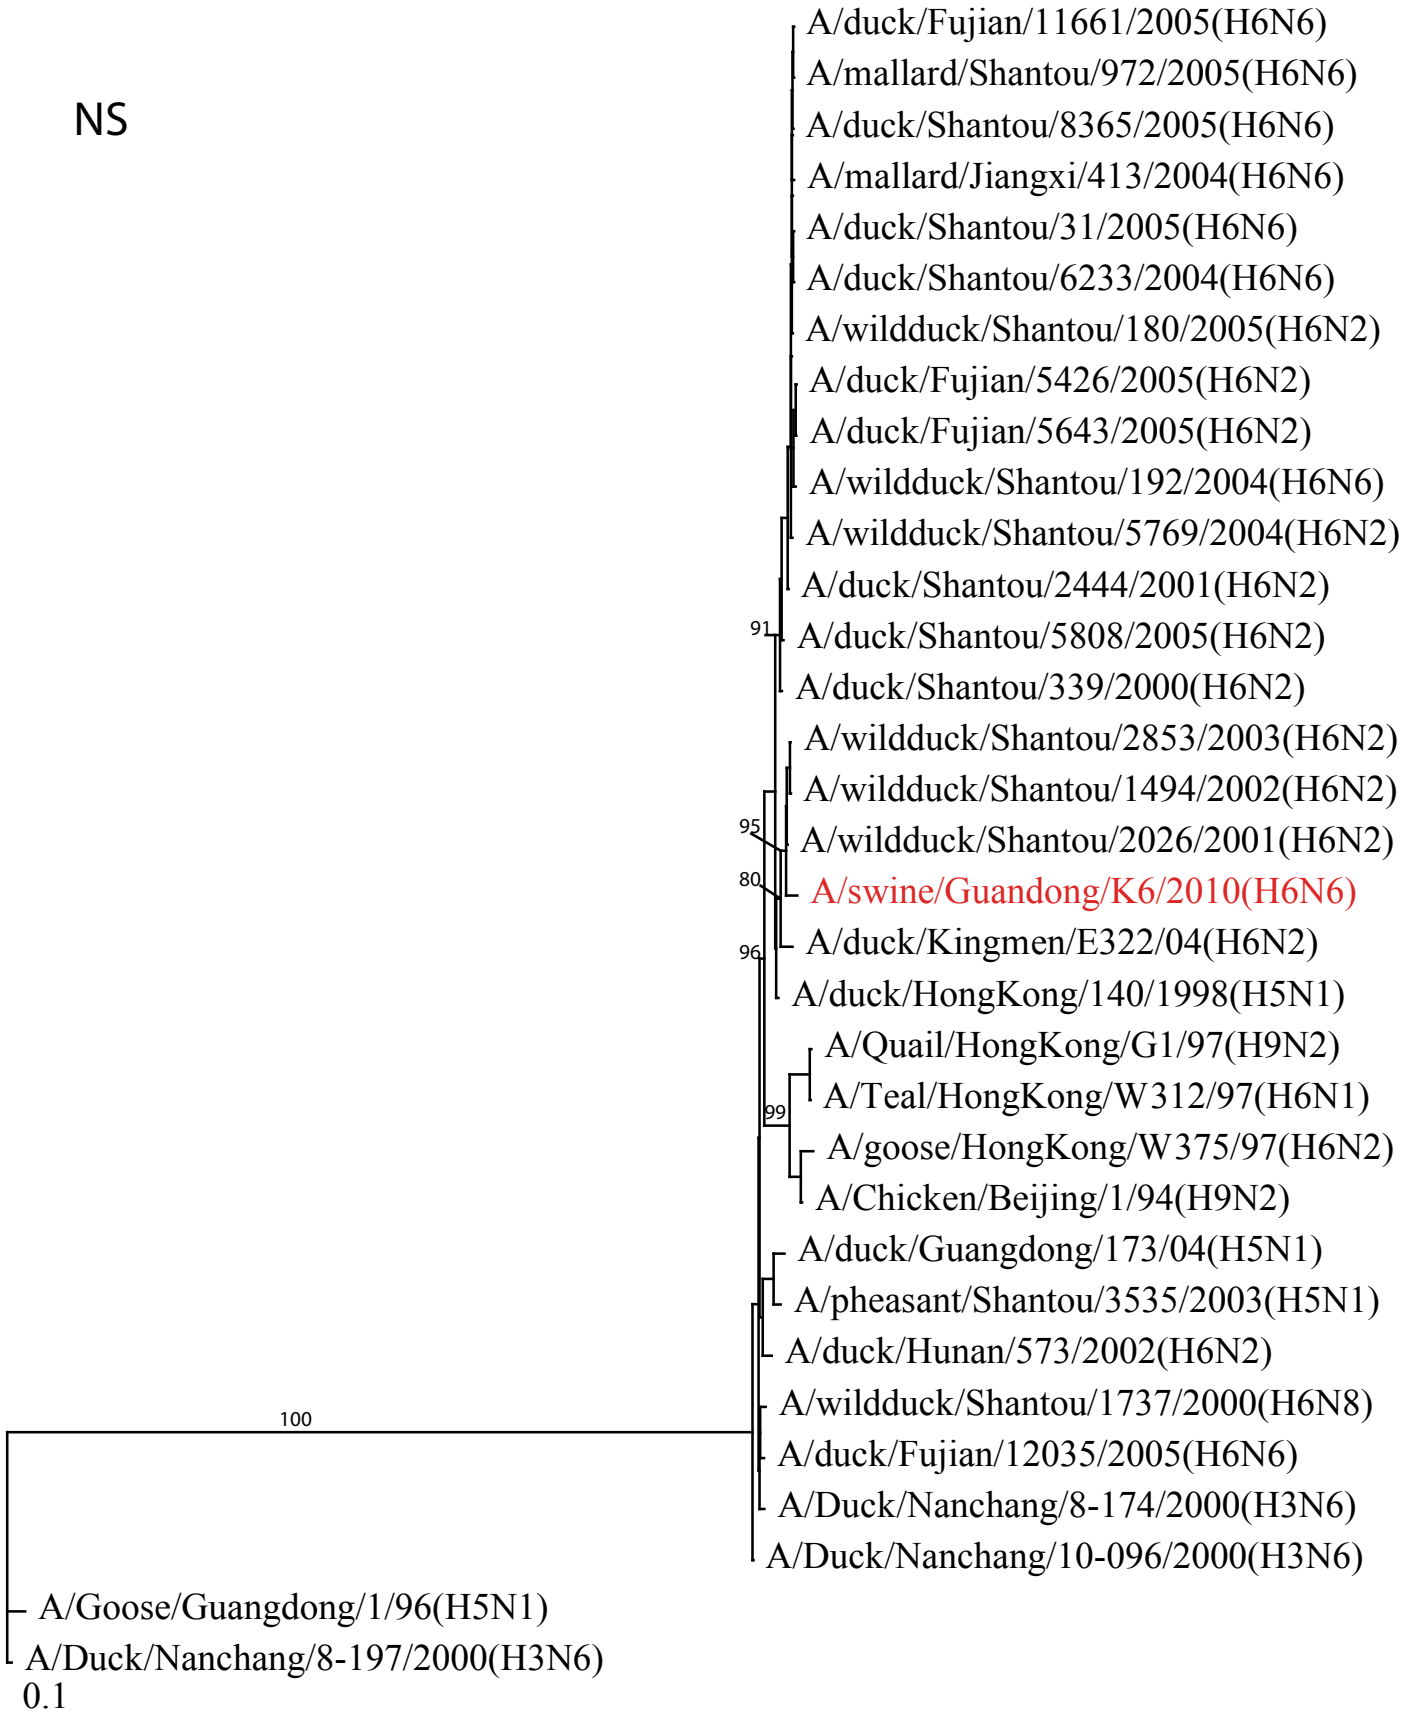

Supplement: NIHMS289162-supplement-01.pdf [file NIHMS289162-supplement-01.pdf]
